# Supplementary material
Source: PubMed Central journal article supplement (PMC5322795)
Supplement: NIHMS850607-supplement-Figures.pdf [file NIHMS850607-supplement-Figures.pdf]

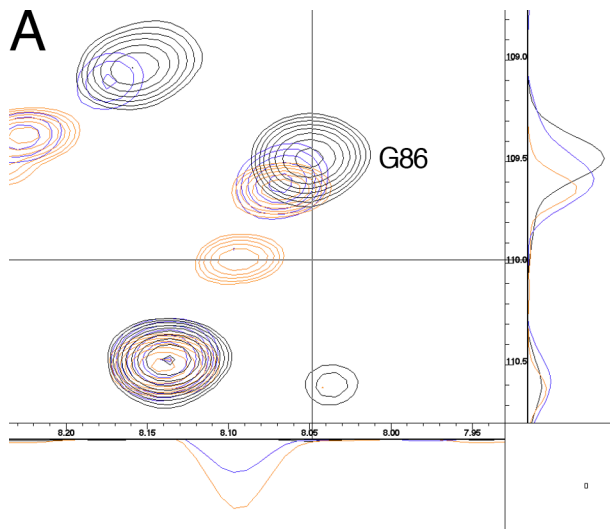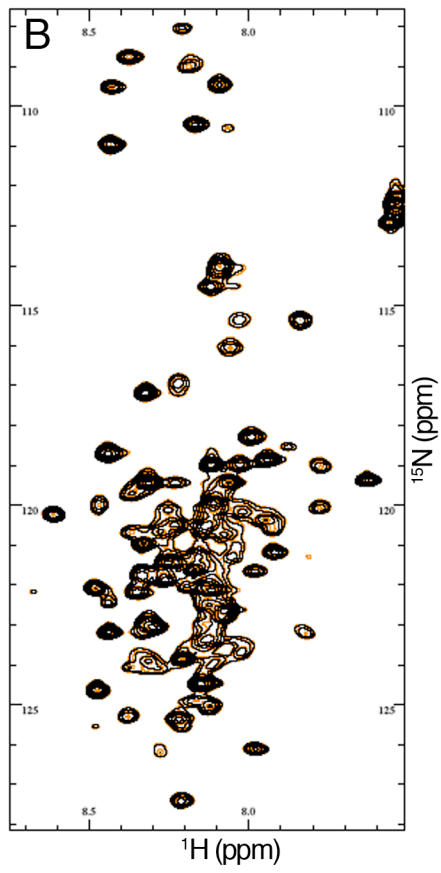

Supplemental Figure 1

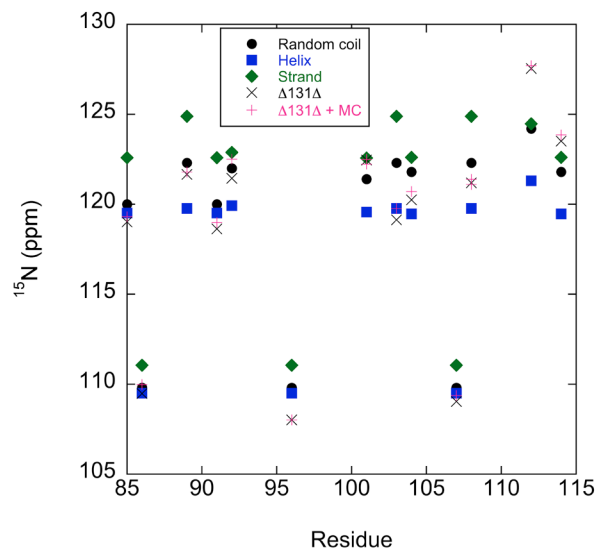

Supplemental Figure 2

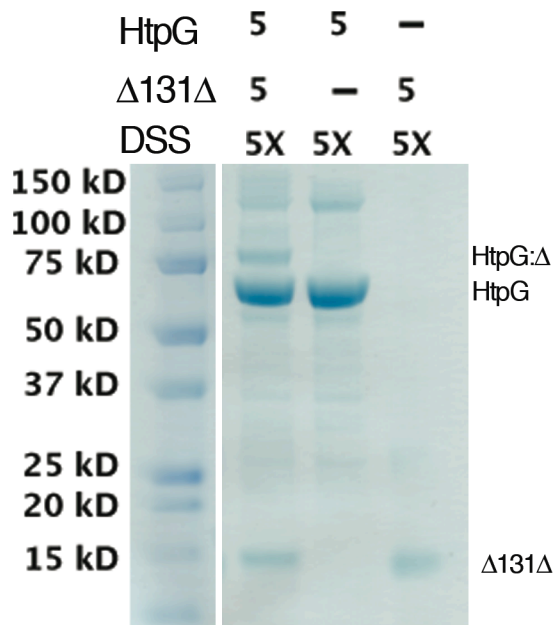

Supplemental Figure 3

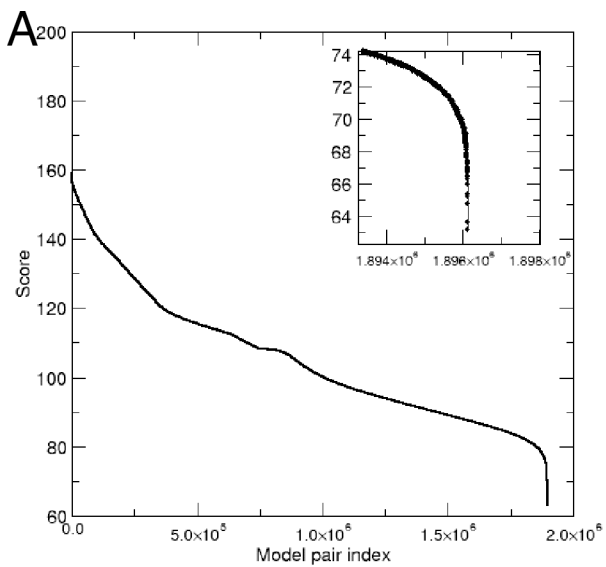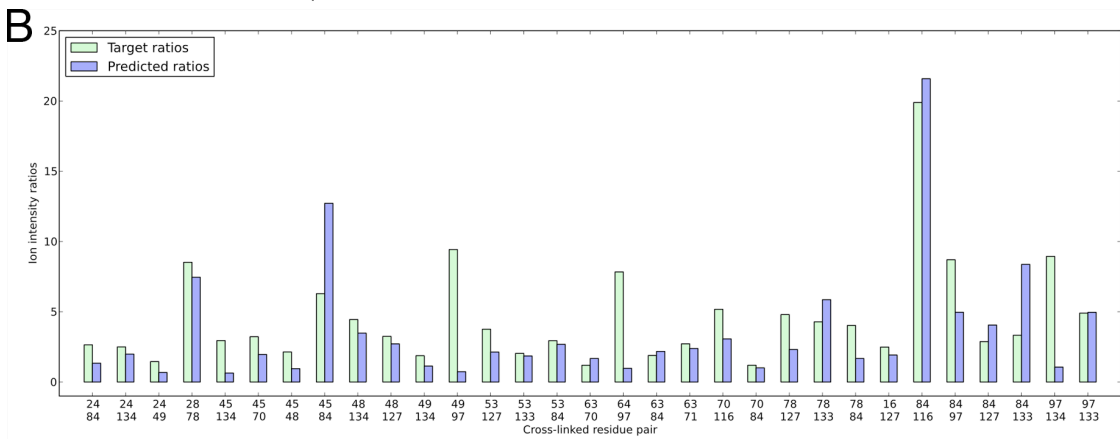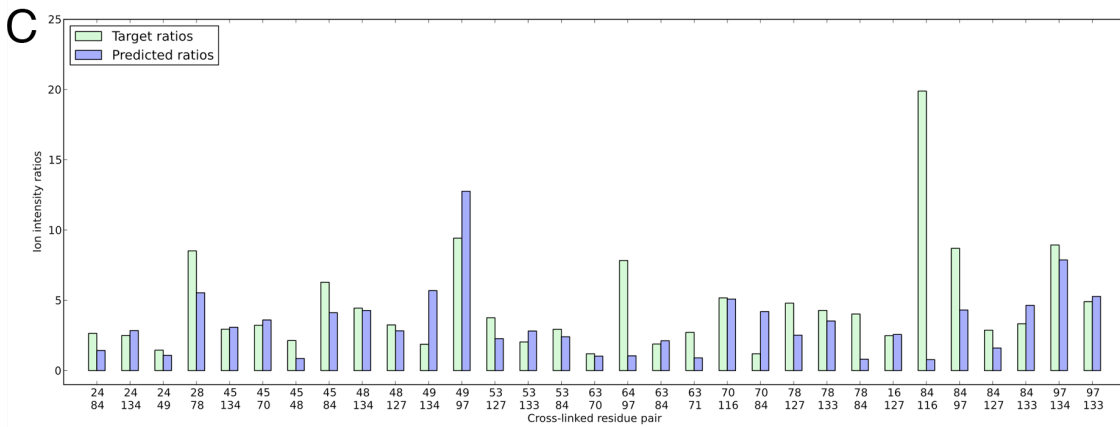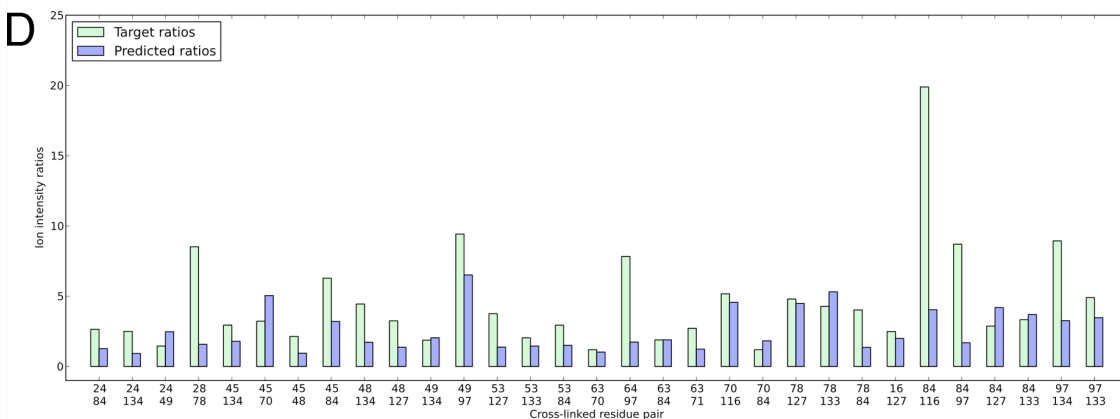

Supplemental Figure 4

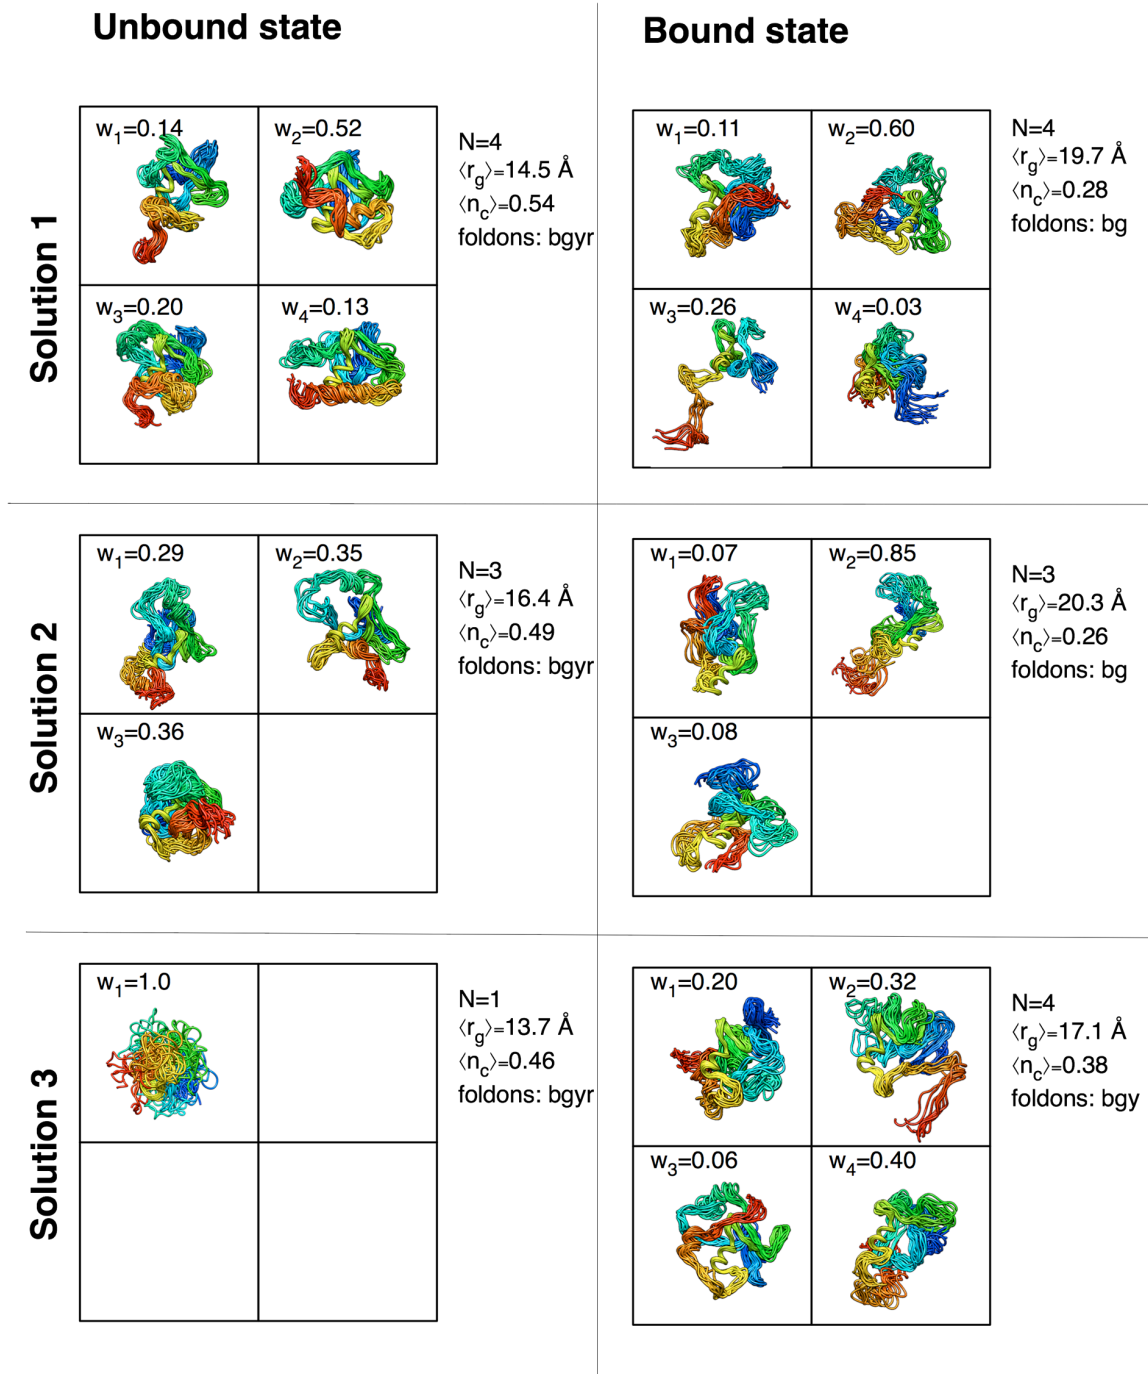

Supplemental Figure 5

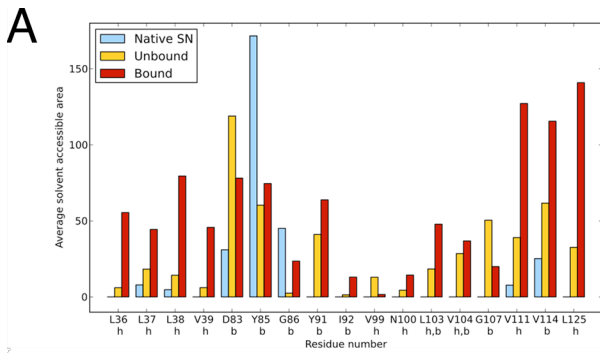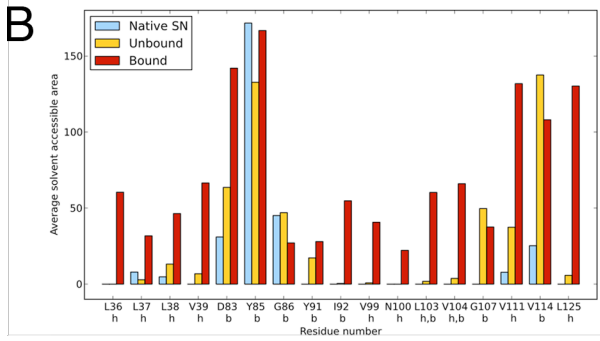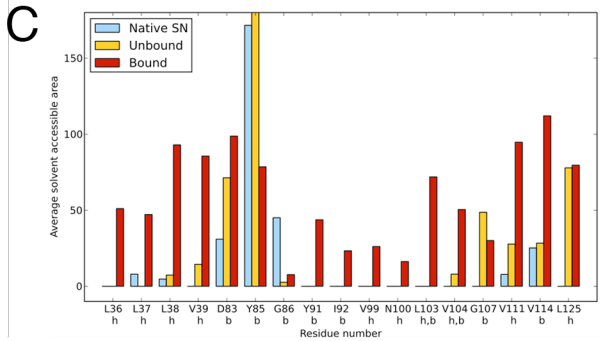

Supplemental Figure 6

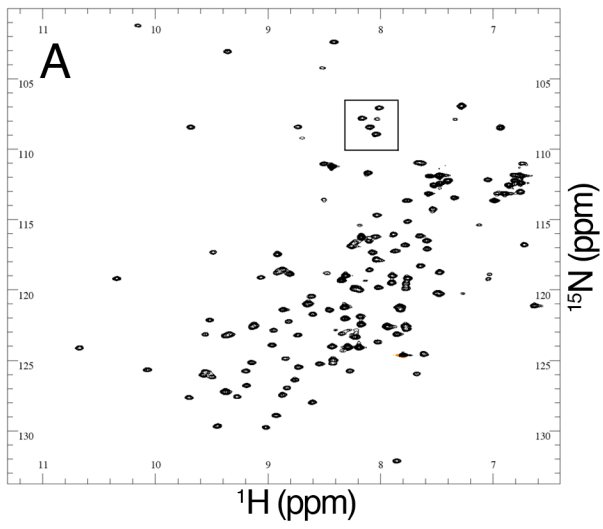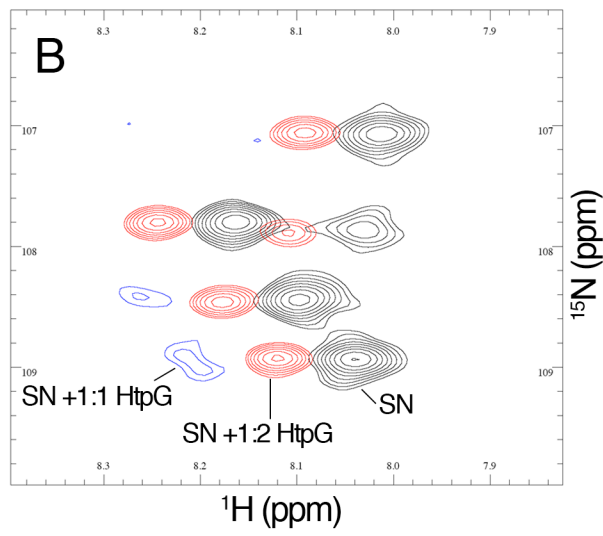

Supplemental Figure 7
